# Supplementary material
Source: PubMed Central journal article supplement (PMC4451707)
Supplement: chest_147_6_1510_ds01.pdf [file chest_147_6_1510_ds01.pdf]

# The Use of Inhaled Prostaglandins in Patients With ARDS

## A Systematic Review and Meta-analysis

*Brian M. Fuller, MD, MSCI; Nicholas M. Mohr, MD; Lee Skrupky, PharmD, BCPS; Susan Fowler, MLIS; Marin H. Kollef, MD, FCCP; and Christopher R. Carpenter, MD*

CHEST 2015; 147(6):1510-1522

*Online supplements are not copyedited prior to posting.*

**The use of inhaled prostaglandins in patients with acute respiratory distress syndrome: a systematic review and meta-analysis**  
**e-Appendix 1. PRISMA Checklist**

| Section/topic                      | #  | Checklist Item                                                                                                                                                                                                                                                                                              | Reported on page # |
|------------------------------------|----|-------------------------------------------------------------------------------------------------------------------------------------------------------------------------------------------------------------------------------------------------------------------------------------------------------------|--------------------|
| <b>TITLE</b>                       |    |                                                                                                                                                                                                                                                                                                             |                    |
| Title                              | 1  | Identify the report as a systematic review, meta-analysis, or both.                                                                                                                                                                                                                                         | 1                  |
| <b>ABSTRACT</b>                    |    |                                                                                                                                                                                                                                                                                                             |                    |
| Structured summary                 | 2  | Provide a structured summary including, as applicable: background; objectives; data sources; study eligibility criteria, participants, and interventions; study appraisal and synthesis methods; results; limitations; conclusions and implications of key findings; systematic review registration number. | 1                  |
| <b>INTRODUCTION</b>                |    |                                                                                                                                                                                                                                                                                                             |                    |
| Rationale                          | 3  | Describe the rationale for the review in the context of what is already known.                                                                                                                                                                                                                              | 2                  |
| Objectives                         | 4  | Provide an explicit statement of questions being addressed with reference to participants, interventions, comparisons, outcomes, and study design (PICOS).                                                                                                                                                  | 2                  |
| <b>METHODS</b>                     |    |                                                                                                                                                                                                                                                                                                             |                    |
| Protocol and registration          | 5  | Indicate if a review protocol exists, if and where it can be accessed (e.g., Web address), and, if available, provide registration information including registration number.                                                                                                                               | 3, e-Appendix 3    |
| Eligibility criteria               | 6  | Specify study characteristics (e.g., PICOS, length of follow-up) and report characteristics (e.g., years considered, language, publication status) used as criteria for eligibility, giving rationale.                                                                                                      | 4                  |
| Information sources                | 7  | Describe all information sources (e.g., databases with dates of coverage, contact with study authors to identify additional studies) in the search and date last searched.                                                                                                                                  | 3                  |
| Search                             | 8  | Present full electronic search strategy for at least one database, including any limits used, such that it could be repeated.                                                                                                                                                                               | 3-4, e-Appendix 3  |
| Study selection                    | 9  | State the process for selecting studies (i.e., screening, eligibility, included in systematic review, and, if applicable, included in the meta-analysis).                                                                                                                                                   | 4                  |
| Data collection process            | 10 | Describe method of data extraction from reports (e.g., piloted forms, independently, in duplicate) and any processes for obtaining and confirming data from investigators.                                                                                                                                  | 4                  |
| Data items                         | 11 | List and define all variables for which data were sought (e.g., PICOS, funding sources) and any assumptions and simplifications made.                                                                                                                                                                       | 4-5, e-Appendix 3  |
| Risk of bias in individual studies | 12 | Describe methods used for assessing risk of bias of individual studies (including specification of whether this was done at the study or outcome level), and how this information is to be used in any data synthesis.                                                                                      | 4-5                |
| Summary measures                   | 13 | State the principal summary measures (e.g., risk ratio, difference in means).                                                                                                                                                                                                                               | 5                  |
| Synthesis of results               | 14 | Describe the methods of handling data and combining results of studies, if done, including measures of consistency (e.g., $I^2$ ) for each meta-analysis.                                                                                                                                                   | 5-6                |

*Online supplements are not copyedited prior to posting.*



| Section/topic                 | #  | Checklist Item                                                                                                                                                                                           | Reported on page #                             |
|-------------------------------|----|----------------------------------------------------------------------------------------------------------------------------------------------------------------------------------------------------------|------------------------------------------------|
| Risk of bias across studies   | 15 | Specify any assessment of risk of bias that may affect the cumulative evidence (e.g., publication bias, selective reporting within studies).                                                             | 5-6                                            |
| Additional analyses           | 16 | Describe methods of additional analyses (e.g., sensitivity or subgroup analyses, meta-regression), if done, indicating which were pre-specified.                                                         | 5-6                                            |
| <b>RESULTS</b>                |    |                                                                                                                                                                                                          |                                                |
| Study selection               | 17 | Give numbers of studies screened, assessed for eligibility, and included in the review, with reasons for exclusions at each stage, ideally with a flow diagram.                                          | 6, Figure 1                                    |
| Study characteristics         | 18 | For each study, present characteristics for which data were extracted (e.g., study size, PICOS, follow-up period) and provide the citations.                                                             | 6-7, Table 1                                   |
| Risk of bias within studies   | 19 | Present data on risk of bias of each study and, if available, any outcome level assessment (see item 12).                                                                                                | 7                                              |
| Results of individual studies | 20 | For all outcomes considered (benefits or harms), present, for each study: (a) simple summary data for each intervention group (b) effect estimates and confidence intervals, ideally with a forest plot. | 7-8, Figure 2, Table 2                         |
| Synthesis of results          | 21 | Present results of each meta-analysis done, including confidence intervals and measures of consistency.                                                                                                  | 7-8, Figure 2, Table 2                         |
| Risk of bias across studies   | 22 | Present results of any assessment of risk of bias across studies (see Item 15).                                                                                                                          | 7-8, e-Figure 1                                |
| Additional analysis           | 23 | Give results of additional analyses, if done (e.g., sensitivity or subgroup analyses, meta-regression [see Item 16]).                                                                                    | 8-9, Table 2, e-Figure 2, e-Table 2, e-Table 3 |
| <b>DISCUSSION</b>             |    |                                                                                                                                                                                                          |                                                |
| Summary of evidence           | 24 | Summarize the main findings including the strength of evidence for each main outcome; consider their relevance to key groups (e.g., healthcare providers, users, and policy makers).                     | 10-11                                          |
| Limitations                   | 25 | Discuss limitations at study and outcome level (e.g., risk of bias), and at review-level (e.g., incomplete retrieval of identified research, reporting bias).                                            | 12                                             |
| Conclusions                   | 26 | Provide a general interpretation of the results in the context of other evidence, and implications for future research.                                                                                  | 12                                             |
| <b>FUNDING</b>                |    |                                                                                                                                                                                                          |                                                |
| Funding                       | 27 | Describe sources of funding for the systematic review and other support (e.g., supply of data); role of funders for the systematic review.                                                               | Title, Page, Acknowledgements                  |

Page numbers provided consider the Abstract as Page 1.

*Online supplements are not copyedited prior to posting.*

**e-Appendix 2. MOOSE Checklist**

|                                                                                                            | Reported on page       | Comments |
|------------------------------------------------------------------------------------------------------------|------------------------|----------|
| <b>Reporting of background should include</b>                                                              |                        |          |
| Problem definition                                                                                         | 2                      |          |
| Hypothesis statement                                                                                       | 2-3                    |          |
| Description of study outcomes                                                                              | 2                      |          |
| Type of exposure or intervention used                                                                      | 2                      |          |
| Type of study designs used                                                                                 | 2-3, e-Appendix 3      |          |
| Study population                                                                                           | 4, e-Appendix 3        |          |
| <b>Reporting of search strategy should include</b>                                                         |                        |          |
| Qualifications of searchers (eg librarians and investigators)                                              | 3, 4, e-Appendix 3     |          |
| Search strategy, including time period used in the synthesis and key words                                 | 3, 4, e-Appendix 3     |          |
| Effort to include all available studies, including contact with authors                                    | 3, 4, e-Appendix 3     |          |
| Databases and registries searched                                                                          | 3                      |          |
| Search software used, name and version, including special features used (eg explosion)                     | e-Appendix 3           |          |
| Use of hand searching (eg reference lists of obtained articles)                                            | 3, 4, e-Appendix 3     |          |
| List of citations located and those excluded, including justification                                      | e-Appendix 3, Figure 1 |          |
| Method of addressing articles published in languages other than English                                    | e-Appendix 3           |          |
| Method of handling abstracts and unpublished studies                                                       | 3, 4                   |          |
| Description of any contact with authors                                                                    | 3                      |          |
| <b>Reporting of methods should include</b>                                                                 |                        |          |
| Description of relevance or appropriateness of studies assembled for assessing the hypothesis to be tested | 4                      |          |
| Rationale for the selection and coding of data                                                             | 4                      |          |

*Online supplements are not copyedited prior to posting.*

|                                                                                                                                                                                                                                                                             |                                |  |
|-----------------------------------------------------------------------------------------------------------------------------------------------------------------------------------------------------------------------------------------------------------------------------|--------------------------------|--|
| (eg sound clinical principles or convenience)                                                                                                                                                                                                                               |                                |  |
| Documentation of how data were classified and coded (eg multiple raters, blinding and interrater reliability)                                                                                                                                                               | 4                              |  |
| Assessment of confounding (eg comparability of cases and controls in studies where appropriate)                                                                                                                                                                             | 4, 5                           |  |
| Assessment of study quality, including blinding of quality assessors, stratification or regression on possible predictors of study results                                                                                                                                  | 4, 5                           |  |
| Assessment of heterogeneity                                                                                                                                                                                                                                                 | 5                              |  |
| Description of statistical methods (eg complete description of fixed or random effects models, justification of whether the chosen models account for predictors of study results, dose-response models, or cumulative meta-analysis) in sufficient detail to be replicated | 5, 6                           |  |
| Provision of appropriate tables and graphics                                                                                                                                                                                                                                | Tables and Figures and eTables |  |
| <b>Reporting of results should include</b>                                                                                                                                                                                                                                  |                                |  |
| Graphic summarizing individual study estimates and overall estimate                                                                                                                                                                                                         | Figure 2                       |  |
| Table giving descriptive information for each study included                                                                                                                                                                                                                | Table 1, e-Table 1             |  |
| Results of sensitivity testing (eg subgroup analysis)                                                                                                                                                                                                                       | Table 2                        |  |
| Indication of statistical uncertainty of findings                                                                                                                                                                                                                           | 7, 8                           |  |
| <b>Reporting of discussion should include</b>                                                                                                                                                                                                                               |                                |  |
| Quantitative assessment of bias (eg publication bias)                                                                                                                                                                                                                       | 10, Table 1                    |  |
| Justification for exclusion (eg exclusion of non-English language citations)                                                                                                                                                                                                | 11, 12                         |  |
| Assessment of quality of included studies                                                                                                                                                                                                                                   | 10, Table 1                    |  |
| <b>Reporting of conclusions should include</b>                                                                                                                                                                                                                              |                                |  |
| Consideration of alternative explanations for                                                                                                                                                                                                                               | 10-12                          |  |

*Online supplements are not copyedited prior to posting.*

|                                                                                                                          |                                |  |
|--------------------------------------------------------------------------------------------------------------------------|--------------------------------|--|
| observed results                                                                                                         |                                |  |
| Generalization of the conclusions (eg appropriate for the data presented and within the domain of the literature review) | 11, 12                         |  |
| Guidelines for future research                                                                                           | 13                             |  |
| Disclosure of funding source                                                                                             | Title<br>Page,Acknowledgements |  |

Page numbers provided consider the Abstract as Page 1.

### e-Appendix 3

#### PROTOCOL: Search and identification of studies

*The use of inhaled prostaglandins in patients with acute respiratory distress syndrome: a systematic review and meta-analysis*

**Patient/Problem:** Mechanically ventilated patients with acute respiratory distress syndrome (ARDS) or acute lung injury (ALI)

**Intervention:** Inhaled epoprostenol or inhaled alprostadil

**Comparison:** Placebo or no intervention/usual care  
Inhaled nitric oxide (iNO)

**Outcome:**

Main outcome measures of interest: oxygenation, pulmonary artery pressures, mortality, adverse effects (report qualitatively and combine *post hoc* if possible)

**Clinical question:** In mechanically ventilated patients with ARDS/ALI, does inhaled epoprostenol or inhaled alprostadil improve oxygenation or clinical outcome?

Is there any consistency in the data with respect to dosing, weaning, or evidence of rebound?

| Inclusion Criteria                                                                                                                                                                                                                                                                                                                                                                                                                                                        | Exclusion Criteria                                                                                                                                                                                                                                                                                                            |
|---------------------------------------------------------------------------------------------------------------------------------------------------------------------------------------------------------------------------------------------------------------------------------------------------------------------------------------------------------------------------------------------------------------------------------------------------------------------------|-------------------------------------------------------------------------------------------------------------------------------------------------------------------------------------------------------------------------------------------------------------------------------------------------------------------------------|
| <p><b>Any language or publication type, including case series/studies providing necessary data</b></p> <p><b>Children and adults</b></p> <p><b>Invasive positive pressure ventilation during study period</b></p> <p><b>Outcomes of interest reported</b></p> <p><b>Crossover trials (e.g. with iNO) must report physiological effects and outcome data of prostaglandins transparently</b></p> <p><b>Must explicitly state the patient population is ALI or ARDS</b></p> | <p><b>Neonatal</b></p> <p><b>Non-human studies</b></p> <p><b>Paper = review, correspondence, or editorial</b></p> <p><b>Intravenous use of pulmonary vasodilators</b></p> <p><b>Epoprostenol or alprostadil for shock , RV failure, or reperfusion injury</b></p> <p><b>Pre- and post- intervention data not reported</b></p> |

*Online supplements are not copyedited prior to posting.*

**Step 1 (Relevance Screen):**

Search PubMed, EMBASE, CINAHL, and the Cochrane Library using the search strategy below.

BMF and NMM: Screen title and abstract of manuscripts resulting from electronic search.

**Step 2:**

Identify unpublished data

BMF: Manually screen reference lists of all review articles from relevance screen

BMF and SF: Search online for details of clinical trials registration (ClinicalTrials.gov)

BMF: Hand search abstracts from: SCCM, ESICM, ATS, CHEST, International Symposium on Intensive Care and Emergency Medicine, and Pharmacotherapy from 1999 to 2014

BMF and NMM: Manually screen reference lists of all articles to be potentially included from electronic and manual review of review articles

BMF: If unpublished data is found and clarification is needed, contact PI of that study

**Step 3:**

BMF, NMM, LS: Full review of the remaining manuscripts for agreement and final inclusion.

**Step 4:**

BMF, NMM, LS: Fill out data abstraction form for final studies included

**Step 5:** Transfer data from Data Abstraction Form to Tables

**Step 6:** Assess Table for potential for meta-analysis of the data

**Rationale for inclusion of non-randomized studies:**

1. There is a high likelihood that the existing body of literature does not contain a sufficient number of randomized trials to investigate the question of interest
2. Inclusion of non-randomized studies will allow an explicit evaluation of the strengths and weaknesses of the current literature
3. Non-randomized studies will allow some assessment of beneficial and harmful effects of inhaled prostaglandins
  - a. Prospective interventional studies will allow an assessment of the influence of prostaglandins on physiology
  - b. Inclusion of cohort studies will allow a better assessment of sustained physiologic benefit, as well as side effects and harm, as reported during using clinical dosing
4. To provide evidence for the undertaking of randomized trials

**SEARCH STRATEGY:**

24255157[uid]

**Mechanically Ventilated**

**Acute lung Injury OR Acute Respiratory Distress Syndrome**

**PubMed**

5/8/2014, 108 Results

*Online supplements are not copyedited prior to posting.*



("Respiratory Distress Syndrome, Adult"[Mesh] OR "Acute Lung Injury"[Mesh] OR "Ventilator-Induced Lung Injury"[Mesh] OR "Shock Lung" OR "respiratory distress syndrome"[tiab] OR "adult respiratory distress" OR ARDS[tiab] OR "pulmonary distress syndrome"[tiab] OR RDS[tiab] OR "Acute Lung Injury"[tiab] OR "Acute Lung Injuries" OR Ventilator Induced Lung Injur\*[tiab] OR VILI[tiab]) AND ("Epoprostenol"[Mesh] OR epoprostenol OR flolan OR pgi2 OR ppx OR prostacyclin OR "prostaglandin i 2" OR "prostaglandin I2" OR "prostaglandin x" OR "u 53217" OR epoprostanol[tiab]) AND ("Outcome Assessment Health Care "[Mesh] OR "Mortality"[Mesh] OR "mortality"[Subheading] OR "Survival"[Mesh] OR "Survival Analysis"[Mesh] OR "Quality of Life"[Mesh] OR "Pain Measurement"[Mesh] OR "Pain"[Mesh] OR "Health"[Mesh] OR "Health Status Indicators"[Mesh] OR "Health Status"[Mesh] OR outcome\* OR respond\* OR response\* OR failure\* OR mortality OR fatal\* OR death OR dead OR deaths OR "passed away" OR demise\* OR Recurren\* OR progression OR progressed OR relaps\* OR growth OR grew OR growing OR regress\* OR surviv\* OR nonsurviv\* OR cure OR cures OR "quality of life" OR qol[tiab] OR HRQL[tiab] OR "life quality"[tiab] OR morbidit\* OR adverse OR side effect\* OR "side effects" OR event OR events OR nausea OR nauseous OR vomit\* OR emesis OR comfort\* OR pain OR painful OR painfree OR stress OR analges\*) NOT ("Animals"[Mesh]) NOT ("Animals"[Mesh] AND "Humans"[Mesh]))

#### **CINAHL**

5/8/2014, 31 Results

(MH "Respiratory Distress Syndrome" OR MH "Respiratory Distress Syndrome, Acute" OR MH "Acute Lung Injury+" OR MH "Ventilator-Induced Lung Injury+" OR "Respiratory Distress Syndrome" OR "Acute Lung Injury" OR "Ventilator-Induced Lung Injury" OR "Shock Lung" OR "adult respiratory distress" OR "ARDS" OR "pulmonary distress syndrome" OR "RDS" OR "Acute Lung Injuries" OR "Ventilator Induced Lung Injury" OR "Ventilator Induced Lung Injuries" OR "VILI") AND (MH "Epoprostenol" OR epoprostenol OR flolan OR pgi2 OR ppx OR prostacyclin OR "prostaglandin i 2" OR "prostaglandin I2" OR "prostaglandin x" OR "u 53217" OR epoprostanol) AND (MH "Outcomes (Health Care)+" OR MH "Outcome Assessment" OR MH "Mortality+" OR MH "Survival" OR MH "Survival Analysis+" OR MH "Quality of Life+" OR MH "Pain+" OR MH "Pain Measurement" OR MH "Health+" OR MH "Health Status+" OR MH "Health Status Indicators" OR "Health Status" OR outcome\* OR respond\* OR response\* OR failure\* OR mortality OR fatal\* OR death OR dead OR deaths OR "passed away" OR demise\* OR Recurren\* OR progression OR progressed OR relaps\* OR growth OR grew OR growing OR regress\* OR surviv\* OR nonsurviv\* OR cure OR cures OR "quality of life" OR qol OR HRQL OR "life quality" OR morbidit\* OR adverse OR side effect\* OR "side effects" OR event OR events OR nausea OR nauseous OR vomit\* OR emesis OR comfort\* OR pain OR painful OR painfree OR stress OR analges\*)

#### **Embase**

5/8/2014, 269 Results

'respiratory distress syndrome'/de OR 'adult respiratory distress syndrome'/exp OR 'ventilator induced lung injury'/exp OR 'acute lung injury'/exp OR 'respiratory distress syndrome' OR 'ARDS' OR 'Shock Lung' OR 'ventilation induced lung injury' OR 'ventilator induced lung injury' OR 'ventilation induced lung injuries' OR 'ventilator induced lung injuries' OR VILI AND ('prostacyclin'/exp OR cycloprostin OR epoprostenol OR epoprostanol OR flolan OR pgi2 OR ppx OR 'prostacyclin' OR 'prostaglandin i 2' OR 'prostaglandin I2' OR 'prostaglandin x' OR 'u 53217' OR 'u 53217a' OR 'u53217' OR u53217a) AND ('outcome assessment'/exp OR 'mortality'/exp OR 'survival'/exp OR 'quality of life'/exp OR 'pain'/exp OR 'pain assessment'/exp OR 'health'/exp OR 'health status'/exp OR 'health status indicator'/exp OR outcome\* OR respond\* OR response\* OR failure\* OR mortality OR fatal\* OR death OR dead OR deaths OR 'passed away' OR demise\* OR Recurren\* OR progression OR progressed OR relaps\* OR growth OR grew OR growing OR regress\* OR surviv\* OR nonsurviv\* OR cure OR cures OR 'quality of life' OR qol OR HRQL OR 'life quality' OR morbidit\* OR adverse OR side

*Online supplements are not copyedited prior to posting.*



effect\* OR 'side effects' OR event OR events OR nausea OR nauseous OR vomit\* OR emesis OR comfort\* OR pain\* OR stress OR analges\*) NOT ([animals]/lim NOT [humans]/lim)

### Scopus

5/8/2014, 51 Results

("Respiratory Distress Syndrome" OR "Acute Lung Injury" OR "Ventilator-Induced Lung Injury" OR "Shock Lung" OR "adult respiratory distress" OR ARDS OR "pulmonary distress syndrome" OR RDS OR "Acute Lung Injuries" OR Ventilator Induced Lung Injur\* OR VILI) AND (epoprostenol OR flolan OR pgi2 OR pgx OR prostacyclin OR "prostaglandin i 2" OR "prostaglandin I2" OR "prostaglandin x" OR "u 53217" OR epoprostanol) AND ("Health Status" OR outcome\* OR respond\* OR response\* OR failure\* OR mortality OR fatal\* OR death OR dead OR deaths OR "passed away" OR demise\* OR Recurren\* OR progression OR progressed OR relaps\* OR growth OR grew OR growing OR regress\* OR surviv\* OR nonsurviv\* OR cure OR cures OR "quality of life" OR qol OR HRQL OR "life quality" OR morbidit\* OR adverse OR side effect\* OR "side effects" OR event OR events OR nausea OR nauseous OR vomit\* OR emesis OR comfort\* OR pain OR painful OR painfree OR stress OR analges\*)

### The Cochrane Library

Cochrane Central Register of Controlled Trials: 5/8/2014, 9 Results

Cochrane Database of Systematic Reviews: 5/8/2014, 15 Results

#1 MeSH descriptor: [Respiratory Distress Syndrome, Adult] explode all trees 592

#2 MeSH descriptor: [Acute Lung Injury] explode all trees 112

#3 MeSH descriptor: [Ventilator-Induced Lung Injury] explode all trees 520

#4 #1 or #2 or #3 or "Respiratory Distress Syndrome" or "Acute Lung Injury" or "Ventilator-Induced Lung Injury" or "Shock Lung" or "adult respiratory distress" or ARDS or "pulmonary distress syndrome" or RDS or "Acute Lung Injuries" or Ventilator Induced Lung Injur\* or VILI 3772

#5 MeSH descriptor: [Epoprostenol] explode all trees 472

#6 #5 or epoprostenol or flolan or pgi2 or pgx or prostacyclin or "prostaglandin i 2" or "prostaglandin I2" or "prostaglandin x" or "u 53217" or epoprostanol 1172

#7 MeSH descriptor: [Outcome Assessment (Health Care)] explode all trees 98934

#8 MeSH descriptor: [Mortality] explode all trees 10968

#9 MeSH descriptor: [Survival] explode all trees 130

#10 MeSH descriptor: [Survival Analysis] explode all trees 15518

#11 MeSH descriptor: [Quality of Life] explode all trees 14757

#12 MeSH descriptor: [Pain Measurement] explode all trees 14960

#13 MeSH descriptor: [Pain] explode all trees 32936

#14 MeSH descriptor: [Health] explode all trees 5818

#15 MeSH descriptor: [Health Status] explode all trees 5336

#16 MeSH descriptor: [Health Status Indicators] explode all trees 16074

#17 #7 or #8 or #9 or #10 or #11 or #12 or #13 or #14 or #15 or #16 or "Health Status" or outcome\* or respond\* or response\* or failure\* or mortality or fatal\* or death or dead or deaths or "passed away" or demise\* or Recurren\* or progression or progressed or relaps\* or growth or grew or growing or regress\* or surviv\* or nonsurviv\* or cure or cures or "quality of life" or qol or HRQL or "life quality" or morbidit\* or adverse or side effect\* or "side effects" or event or events or nausea or nauseous or vomit\* or emesis or comfort\* or pain or painful or painfree or stress or analges\* 502647

#18 #4 and #6 and #17 24

*Online supplements are not copyedited prior to posting.*

**ClinicalTrials.Gov**

5/8/2014, 2 Results

Advanced Search...

Conditions: Respiratory Distress Syndrome OR Acute Lung Injury

Interventions: epoprostenol OR flolan OR prostacyclin

*Online supplements are not copyedited prior to posting.*

**e-Table 1 Study Results**

| <b>Randomized Controlled Trials</b>                      |                                                                                                                                                          |                                                                                                                                                          |                                    |                                                                                                                                    |                                                                           |
|----------------------------------------------------------|----------------------------------------------------------------------------------------------------------------------------------------------------------|----------------------------------------------------------------------------------------------------------------------------------------------------------|------------------------------------|------------------------------------------------------------------------------------------------------------------------------------|---------------------------------------------------------------------------|
| <b>Author, Year</b>                                      | <b>Pre-intervention value</b>                                                                                                                            | <b>Post-intervention value</b>                                                                                                                           | <b>p</b>                           | <b>Dosing</b>                                                                                                                      | <b>Comments</b>                                                           |
| Dahlem, 2004                                             | OI 10.0 (7.8-14.5)<br>P <sub>a</sub> O <sub>2</sub> :F <sub>i</sub> O <sub>2</sub> 194 (120-219)                                                         | OI 7.4 (6.5-9.7)<br>P <sub>a</sub> O <sub>2</sub> :F <sub>i</sub> O <sub>2</sub> Not reported                                                            | 0.001                              | Dose response protocol<br><br>Range 10-50ng/kg/min                                                                                 | Significant improvement in OI at 30ng/kg/min                              |
| Siddiqui, 2013                                           | P <sub>a</sub> O <sub>2</sub> :F <sub>i</sub> O <sub>2</sub> 148.4 (60.1)                                                                                | P <sub>a</sub> O <sub>2</sub> :F <sub>i</sub> O <sub>2</sub> 161.5 (77.5)                                                                                | 0.21                               | 20ug nebulized over 30 minutes                                                                                                     |                                                                           |
| <b>Prospective, nonrandomized interventional studies</b> |                                                                                                                                                          |                                                                                                                                                          |                                    |                                                                                                                                    |                                                                           |
| <b>Author, Year</b>                                      | <b>Pre-intervention value</b>                                                                                                                            | <b>Post-intervention value</b>                                                                                                                           | <b>p</b>                           | <b>Dosing</b>                                                                                                                      | <b>Comments</b>                                                           |
| Walmrath, 1996                                           | P <sub>a</sub> O <sub>2</sub> :F <sub>i</sub> O <sub>2</sub> 114 (11.9)<br>P <sub>a</sub> O <sub>2</sub> 72.5 (3.2)<br>mPAP 35.0 (2.2)<br>PVR 228 (27.5) | P <sub>a</sub> O <sub>2</sub> :F <sub>i</sub> O <sub>2</sub> 135 (12.0)<br>P <sub>a</sub> O <sub>2</sub> 88.0 (4.7)<br>mPAP 31.9 (1.7)<br>PVR 182 (17.0) | <0.001<br><0.001<br><0.05<br><0.05 | Titrated to maximal effect on oxygenation<br><br>Mean 7.5 (2.5) ng/kg/min<br><br>Range 1.5 to 34 ng/kg/min                         | No difference in outcomes between PG <sub>I</sub> <sub>2</sub> and iNO    |
| van Heerden, 1996                                        | P <sub>a</sub> O <sub>2</sub> 80.0 (14.3)<br>mPAP Not reported                                                                                           | P <sub>a</sub> O <sub>2</sub> 122.3 (11.8)<br>mPAP Reduced in all                                                                                        | 0.06<br>NS                         | 50 ng/kg/min                                                                                                                       |                                                                           |
| Zwissler, 1996                                           | P <sub>a</sub> O <sub>2</sub> 105 (10)<br>mPAP 35.1 (2.0)<br>PVR 225 (30.0)                                                                              | P <sub>a</sub> O <sub>2</sub> 130 (12)<br>mPAP 28.0 (1.5)<br>PVR 190 (25.0)                                                                              | <0.05<br><0.05<br><0.05            | 1, 10, then 25 ng/kg/min (each for 15 minutes)                                                                                     | No significant increase in P <sub>a</sub> O <sub>2</sub> at 1 ng/kg/min   |
| Putensen, 1998                                           | P <sub>a</sub> O <sub>2</sub> 77 (3)<br>mPAP 40.0 (2.0)<br>PVR 156 (15.0)                                                                                | P <sub>a</sub> O <sub>2</sub> 95 (4)<br>mPAP 32.0 (2)<br>PVR 100 (12.0)                                                                                  | <0.05<br><0.05<br><0.05            | Titrated by 1ng/kg/min for maximal effect on P <sub>a</sub> O <sub>2</sub><br><br>Mean 10(1) ng/kg/min<br><br>Range 6-15 ng/kg/min |                                                                           |
| van Heerden, 2000                                        | P <sub>a</sub> O <sub>2</sub> :F <sub>i</sub> O <sub>2</sub> 187.2 (10)<br>mPAP 29 (1)                                                                   | P <sub>a</sub> O <sub>2</sub> :F <sub>i</sub> O <sub>2</sub> 202.2 (10)<br>mPAP 28 (1)                                                                   | <0.008<br>0.38                     | Titrated by 10ng/kg/min                                                                                                            | No difference between doses of 10 and 50                                  |
| Domenighetti, 2001                                       | P <sub>a</sub> O <sub>2</sub> :F <sub>i</sub> O <sub>2</sub> 155 (15)<br>P <sub>a</sub> O <sub>2</sub> 81 (3)<br>mPAP 32 (1)<br>PVR 177 (18)             | P <sub>a</sub> O <sub>2</sub> :F <sub>i</sub> O <sub>2</sub> 157 (15)<br>P <sub>a</sub> O <sub>2</sub> 82 (3)<br>mPAP 29 (1)<br>PVR 153 (18)             | NS<br>NS<br><0.05<br><0.05         | Titrated for optimal P <sub>a</sub> O <sub>2</sub><br><br>Mean 34(9) ng/kg/min                                                     | Responders 8/15<br>0/6 patients with pulmonary ARDS responded<br>Worsened |

*Online supplements are not copyedited prior to posting.*



|                                     |                                                                                                                                                                                                                                                                                                       |                                                                                                                                                                                                                                                                                                         |                                  |                                                                                                                                                                                    | Range 2-40 ng/kg/min                                              | oxygenation in pulmonary ARDS |
|-------------------------------------|-------------------------------------------------------------------------------------------------------------------------------------------------------------------------------------------------------------------------------------------------------------------------------------------------------|---------------------------------------------------------------------------------------------------------------------------------------------------------------------------------------------------------------------------------------------------------------------------------------------------------|----------------------------------|------------------------------------------------------------------------------------------------------------------------------------------------------------------------------------|-------------------------------------------------------------------|-------------------------------|
| <b>Observational cohort studies</b> |                                                                                                                                                                                                                                                                                                       |                                                                                                                                                                                                                                                                                                         |                                  |                                                                                                                                                                                    |                                                                   |                               |
| Author, Year                        | Pre-intervention value                                                                                                                                                                                                                                                                                | Post-intervention value                                                                                                                                                                                                                                                                                 | <i>p</i>                         | Dosing                                                                                                                                                                             | Comments                                                          |                               |
| Meyer, 1998                         | P <sub>a</sub> O <sub>2</sub> 60 (5)<br>P <sub>a</sub> O <sub>2</sub> :F <sub>i</sub> O <sub>2</sub> 100 (5)<br>mPAP 38 (4)                                                                                                                                                                           | P <sub>a</sub> O <sub>2</sub> 90 (10)<br>P <sub>a</sub> O <sub>2</sub> :F <sub>i</sub> O <sub>2</sub> 240 (30)<br>mPAP 32 (2)                                                                                                                                                                           | <0.05<br><0.05<br><0.1           | Mean 41 (2) ug/h<br><br>Range 20-80 ug/h                                                                                                                                           | Weaning at intensivist discretion                                 |                               |
| Siobal, 2003                        | P <sub>a</sub> O <sub>2</sub> :F <sub>i</sub> O <sub>2</sub> 60 (11)<br>S <sub>p</sub> O <sub>2</sub> 85.7 (7.7)                                                                                                                                                                                      | P <sub>a</sub> O <sub>2</sub> :F <sub>i</sub> O <sub>2</sub> 80 (17)<br>S <sub>p</sub> O <sub>2</sub> 93.6 (3.3)                                                                                                                                                                                        | 0.002<br>0.001                   | Mean 28(17) ng/kg/min<br><br>Range 10-50ng/kg/min                                                                                                                                  | Measurements taken within 2 hours of PGI <sub>2</sub> initiation  |                               |
| Rovira, 2004                        | P <sub>a</sub> O <sub>2</sub> :F <sub>i</sub> O <sub>2</sub> 152 (30)                                                                                                                                                                                                                                 | P <sub>a</sub> O <sub>2</sub> :F <sub>i</sub> O <sub>2</sub> 203 (40)                                                                                                                                                                                                                                   | <0.05                            | Not reported                                                                                                                                                                       |                                                                   |                               |
| Camamo, 2005                        | <u>PGI<sub>2</sub></u><br>P <sub>a</sub> O <sub>2</sub> :F <sub>i</sub> O <sub>2</sub> 66.7 (23)<br>P <sub>a</sub> O <sub>2</sub> 62.9 (15.9)<br><br><u>PGE<sub>1</sub></u><br>P <sub>a</sub> O <sub>2</sub> :F <sub>i</sub> O <sub>2</sub> 106.1 (53.4)<br>P <sub>a</sub> O <sub>2</sub> 88.9 (38.7) | <u>PGI<sub>2</sub></u><br>P <sub>a</sub> O <sub>2</sub> :F <sub>i</sub> O <sub>2</sub> 58.2 (22.4)<br>P <sub>a</sub> O <sub>2</sub> 53.7 (17.4)<br><br><u>PGE<sub>1</sub></u><br>P <sub>a</sub> O <sub>2</sub> :F <sub>i</sub> O <sub>2</sub> 123.5 (77.6)<br>P <sub>a</sub> O <sub>2</sub> 78.1 (22.9) | 0.17<br>0.08<br><br>0.21<br>0.34 | Start 17.4 (12.5) ng/kg/min<br>Max 34.3 (13.2) ng/kg/min<br><br>Start 15.8(7) ng/kg/min<br>Max 28.3(14.2) ng/kg/min                                                                | No difference between the two drugs on MV duration, HLOS, ICU LOS |                               |
| Raheem, 2009                        | P <sub>a</sub> O <sub>2</sub> :F <sub>i</sub> O <sub>2</sub> 57.7 (11.8)                                                                                                                                                                                                                              | P <sub>a</sub> O <sub>2</sub> :F <sub>i</sub> O <sub>2</sub> 105.7 (33.3)                                                                                                                                                                                                                               | Not reported                     | Not reported                                                                                                                                                                       | No difference in oxygenation between doses ≤12.5 or ≥ 25          |                               |
| Ross, 2012                          | P <sub>a</sub> O <sub>2</sub> :F <sub>i</sub> O <sub>2</sub> 62.5 (24.4)<br>P <sub>a</sub> O <sub>2</sub> 59.1 (6.9)<br>S <sub>p</sub> O <sub>2</sub> 83.3 (8.9)                                                                                                                                      | P <sub>a</sub> O <sub>2</sub> :F <sub>i</sub> O <sub>2</sub> 130.9 (38.6)<br>P <sub>a</sub> O <sub>2</sub> 117.9 (32.8)<br>S <sub>p</sub> O <sub>2</sub> 95.6 (4.1)                                                                                                                                     | Not reported                     | Start 23.3 (18.3) ng/kg/min<br><br>Max 39.9 (11.9) ng/kg/min                                                                                                                       | Dosed based on IBW                                                |                               |
| Dunkley, 2013                       | P <sub>a</sub> O <sub>2</sub> :F <sub>i</sub> O <sub>2</sub> 104.9 (48.5)                                                                                                                                                                                                                             | P <sub>a</sub> O <sub>2</sub> :F <sub>i</sub> O <sub>2</sub> 155.6 (94.6)                                                                                                                                                                                                                               | Not reported                     | Start 30 (10) ng/kg/min<br><br>Max 50 ng/kg/min                                                                                                                                    | 10/16 patients with no titration                                  |                               |
| Pacheo, 2013                        | <u>Survivors</u><br>P <sub>a</sub> O <sub>2</sub> :F <sub>i</sub> O <sub>2</sub> 94.1 (34.5)<br><br><u>Nonsurvivors</u><br>P <sub>a</sub> O <sub>2</sub> :F <sub>i</sub> O <sub>2</sub> 81.7 (32.7)                                                                                                   | <u>Survivors</u><br>P <sub>a</sub> O <sub>2</sub> :F <sub>i</sub> O <sub>2</sub> 254.3 (123.0)<br><br><u>Nonsurvivors</u><br>P <sub>a</sub> O <sub>2</sub> :F <sub>i</sub> O <sub>2</sub> 142.7 (102.2)                                                                                                 | <0.05<br><br><0.05               | <u>1<sup>st</sup> 24 hours</u><br>Survivors 26.5 (10.3) ng/kg/min<br>Nonsurvivors 34.9 (12.4) ng/kg/min<br><br><u>End of therapy</u><br>Survivors 13.3 (10.9)<br>Nonsurvivors 32.6 | No weaning occurred in nonsurvivors                               |                               |

*Online supplements are not copyedited prior to posting.*



| Torbic, 2013                        | P <sub>a</sub> O <sub>2</sub> :F <sub>i</sub> O <sub>2</sub> 110 (20)#                                  | P <sub>a</sub> O <sub>2</sub> :F <sub>i</sub> O <sub>2</sub> 143.0 (36.2)                                 | Not reported | (14.7)<br>Protocol: start at .05 ug/kg/min and decrease by .01 ug/kg/min every 1-2 hours as tolerated until off |                                        |
|-------------------------------------|---------------------------------------------------------------------------------------------------------|-----------------------------------------------------------------------------------------------------------|--------------|-----------------------------------------------------------------------------------------------------------------|----------------------------------------|
| Singh, 2014                         | P <sub>a</sub> O <sub>2</sub> :F <sub>i</sub> O <sub>2</sub> 78.9 (30.2)                                | P <sub>a</sub> O <sub>2</sub> :F <sub>i</sub> O <sub>2</sub> 121.8 (71)                                   | <0.0001      | 20ng/kg/min                                                                                                     | Nonresponders 25.5%                    |
| <b>Case studies and case series</b> |                                                                                                         |                                                                                                           |              |                                                                                                                 |                                        |
| Author, Year                        | Pre-intervention value                                                                                  | Post-intervention value                                                                                   | <i>p</i>     | Dosing                                                                                                          | Comments                               |
| Walmrath, 1993                      | P <sub>a</sub> O <sub>2</sub> :F <sub>i</sub> O <sub>2</sub> 119.5 (19.3)<br>mPAP 40.3 (13.5)           | P <sub>a</sub> O <sub>2</sub> :F <sub>i</sub> O <sub>2</sub> 173.0 (17.7)<br>mPAP 32.0 (3.8)              | Not reported | 17-50ng/kg/min                                                                                                  |                                        |
| Bein, 1994                          | P <sub>a</sub> O <sub>2</sub> 79.4<br>mPAP 49.0                                                         | P <sub>a</sub> O <sub>2</sub> 150.5<br>mPAP 38.0                                                          | Not reported | 5 ng/kg/min                                                                                                     |                                        |
| Pappert, 1995                       | P <sub>a</sub> O <sub>2</sub> :F <sub>i</sub> O <sub>2</sub> 76.3 (2.5)                                 | P <sub>a</sub> O <sub>2</sub> :F <sub>i</sub> O <sub>2</sub> 91.3 (17.6)                                  | Not reported | 2-20 ng/kg/min                                                                                                  |                                        |
| van Heerden, 1996                   | P <sub>a</sub> O <sub>2</sub> :F <sub>i</sub> O <sub>2</sub> 76.0                                       | P <sub>a</sub> O <sub>2</sub> :F <sub>i</sub> O <sub>2</sub> 270.0                                        | Not reported | 20-50 ng/kg/min                                                                                                 | Only reported oxygenation on 1 patient |
| van Heerden, 1997                   | P <sub>a</sub> O <sub>2</sub> 84.0                                                                      | P <sub>a</sub> O <sub>2</sub> 110.0                                                                       | Not reported | 10-50 ng/kg/min                                                                                                 |                                        |
| Allan, 2010                         | P <sub>a</sub> O <sub>2</sub> :F <sub>i</sub> O <sub>2</sub> 57.0<br>P <sub>a</sub> O <sub>2</sub> 57.0 | P <sub>a</sub> O <sub>2</sub> :F <sub>i</sub> O <sub>2</sub> 200.0<br>P <sub>a</sub> O <sub>2</sub> 147.0 | Not reported | 13 ng/kg/min                                                                                                    |                                        |
| McMillen, 2011                      | P <sub>a</sub> O <sub>2</sub> :F <sub>i</sub> O <sub>2</sub> 66.3 (8.5)                                 | P <sub>a</sub> O <sub>2</sub> :F <sub>i</sub> O <sub>2</sub> 92.5 (45)                                    | Not reported | 20-40 ng/kg/min                                                                                                 |                                        |

OI: oxygenation index; P<sub>a</sub>O<sub>2</sub>: partial pressure of arterial oxygen; F<sub>i</sub>O<sub>2</sub>: fraction of inspired oxygen; mPAP: mean pulmonary artery pressure; PVR: pulmonary vascular resistance; NS: not significant; PGI<sub>2</sub>: epoprostenol; iNO: inhaled nitric oxide; ARDS: acute respiratory distress syndrome; PGE<sub>1</sub>: alprostadil; S<sub>p</sub>O<sub>2</sub>: peripheral oxygen saturation; NS: non-significant; MV: mechanical ventilation; HLOS: hospital length of stay; ICU LOS: intensive care unit length of stay; IBW: ideal body weight  
# Estimated from figures

*Online supplements are not copyedited prior to posting.*

**e-Table 2.** Adverse effects of inhaled prostaglandins

| Author, Year       | Adverse effects mentioned?        | Details of reported side effects                                                                                                                                                                                                                   |
|--------------------|-----------------------------------|----------------------------------------------------------------------------------------------------------------------------------------------------------------------------------------------------------------------------------------------------|
| Dahlem, 2004       | Yes                               | No side effects reported<br>No effect on systemic hemodynamics<br>No bleeding complications                                                                                                                                                        |
| Siddiqui, 2013     | Yes                               | None reported                                                                                                                                                                                                                                      |
| Walmrath, 1996     | Yes                               | No effect on systemic hemodynamics                                                                                                                                                                                                                 |
| Van Heerden, 1996  | Yes                               | No effect on systemic hemodynamics                                                                                                                                                                                                                 |
| Zwissler, 1996     | Yes                               | Hypotension, n= 1 (12.5%)                                                                                                                                                                                                                          |
| Putensen, 1998     | Yes                               | No effect on systemic hemodynamics                                                                                                                                                                                                                 |
| van Heerden, 2000  | Yes                               | No effect on systemic hemodynamics<br>No effect on platelet aggregation (but wide variation)<br>Dose response of 6-keto PGF <sub>1α</sub>                                                                                                          |
| Domenighetti, 2001 | Yes                               | No effect on systemic hemodynamics                                                                                                                                                                                                                 |
| Meyer, 1998        | Yes                               | No effect on systemic hemodynamics                                                                                                                                                                                                                 |
| Siobal, 2003       | Yes                               | Decrease in P <sub>a</sub> O <sub>2</sub> , n= 1 (9.1%)                                                                                                                                                                                            |
| Rovira, 2004       | Yes                               | No "significant hemodynamic changes observed"                                                                                                                                                                                                      |
| Camamo, 2005       | No                                |                                                                                                                                                                                                                                                    |
| Raheem, 2009       | No                                |                                                                                                                                                                                                                                                    |
| Ross, 2012         | No (Obtained from author contact) | AKI, n=1 (8.3%)<br>Bleeding, n=1 (8.3%)<br>Hypotension, n=2 (16.7%)<br>Thrombocytopenia, n=4 (33.3%)                                                                                                                                               |
| Dunkley, 2013      | Yes                               | Medication error, n= (25%)<br><br>Hypotension, n= 3 (18.8%); tachycardia, n= 2 (12.5%); Hyperkalemia, n= 2 (12.5%); Hypokalemia, n= 1 (6.3%); thrombocytopenia, n= 2 (12.5%); anemia, n= 2 (12.5%); Increased LFTs, n= 2 (12.5%), AKI, n= 1 (6.3%) |
| Pacheo, 2013       | No                                |                                                                                                                                                                                                                                                    |
| Torbic, 2013       | Yes                               | PRBC transfusion and platelet transfusion in 25/52 and 10/52 respectively                                                                                                                                                                          |
| Singh, 2014        | Yes                               | Hypotension, n= 21 (21.4%)<br>Tachycardia, n=11 (11.2%)                                                                                                                                                                                            |
| Walmrath, 1993     | Yes                               | Hypotension, n= 1 (33.3%)                                                                                                                                                                                                                          |
| Bein, 1994         | Yes                               | No effect on arterial pressure                                                                                                                                                                                                                     |
| Pappert, 1995      | Yes                               | No effect on arterial pressure or cardiac output<br>Decrease in P <sub>a</sub> O <sub>2</sub> , n= 1 (33.3%)                                                                                                                                       |
| van Heerden, 1996  | Yes                               | No evidence of systemic hypotension                                                                                                                                                                                                                |
| van Heerden, 1997  | Yes                               | Reduction in platelet aggregation<br>Dose response of 6-keto PGF <sub>1α</sub>                                                                                                                                                                     |
| Allan, 2010        | No                                |                                                                                                                                                                                                                                                    |
| McMillen, 2011     | Yes                               | Decrease in P <sub>a</sub> O <sub>2</sub> , n= 3 (75.0%)                                                                                                                                                                                           |

*Online supplements are not copyedited prior to posting.*

**e-Table 3** Reported mortality in ARDS patients receiving inhaled prostaglandins

| Outcome           | Author, Year       | N                 | Mortality, n (%)                        |
|-------------------|--------------------|-------------------|-----------------------------------------|
| <b>Mortality*</b> | Pappert, 1995      | 3                 | 1 (33.3)                                |
|                   | Walmrath, 1996     | 16                | 7 (43.8)                                |
|                   | Zwissler, 1996     | 8                 | 2 (25)                                  |
|                   | van Heerden, 1997  | 1                 | 1 (100)                                 |
|                   | Meyer, 1998        | 15                | 6 (40)                                  |
|                   | Putensen, 1998     | 10                | 3 (30)                                  |
|                   | Domenighetti, 2001 | 15                | 7 (46.7)                                |
|                   | Siobal, 2011       | 11                | 7 (63.6)                                |
|                   | Dahlem, 2004       | 14                | 3 (21.4)                                |
|                   | Camamo, 2005       | 27                | 18 (66.7)                               |
|                   | Raheem, 2009       | 15                | 5 (33.3)                                |
|                   | Allan, 2010        | 1                 | 0 (0%)                                  |
|                   | McMillen, 2011     | 4                 | 3 (75)                                  |
|                   | Dunkley, 2013      | 16                | 9 (56.3)                                |
|                   | Pacheo, 2013       | 216               | 136 (63.0) hospital<br>148 (68.5) at 90 |
|                   | Torbic, 2013       | 52 (32 with ARDS) | 26 (50.0)                               |
|                   | Singh, 2014        | 98                | 49 (50.0)                               |
| <b>Total</b>      | <b>17 studies</b>  | <b>522</b>        | <b>295 (56.5%)</b>                      |

*Online supplements are not copyedited prior to posting.*
